# Supplementary material
Source: publisher figshare collection journal article supplement (https://acs.figshare.com/ndownloader/files/28570547)
Supplement: Supplementary file 1 [file 28570547]

# Supporting Information

## **Fluorinated Carbons as Rechargeable Li-Ion Battery Cathodes in the Voltage Window of 0.5-4.8 V**

Pengyu Chen, Cheng Jiang, Jie Jiang, Jian Zou, Qiwen Ran, Xin Wang, Xiaobin Niu,  
Liping Wang<sup>\*</sup>

School of Materials and Energy, University of Electronic Science and Technology of  
China, Chengdu 611731, China

<sup>\*</sup> Corresponding author

E-mail address: [lipingwang@uestc.edu.cn](mailto:lipingwang@uestc.edu.cn) (L. Wang)

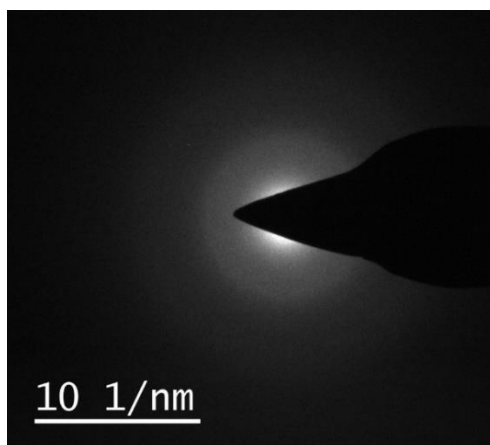

**Figure S1.** SAED pattern obtained from fluorinated graphite CF<sub>0.88</sub>.

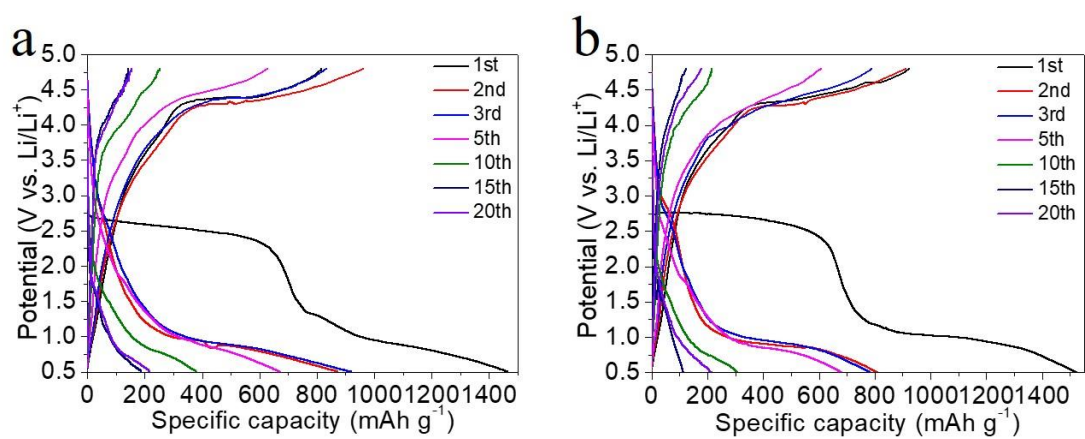

**Figure S2.** Discharge-charge profiles for the fluorinated graphene (a) and fluorinated carbon nanotubes (b) in the voltage window of 0.5-4.8 V.

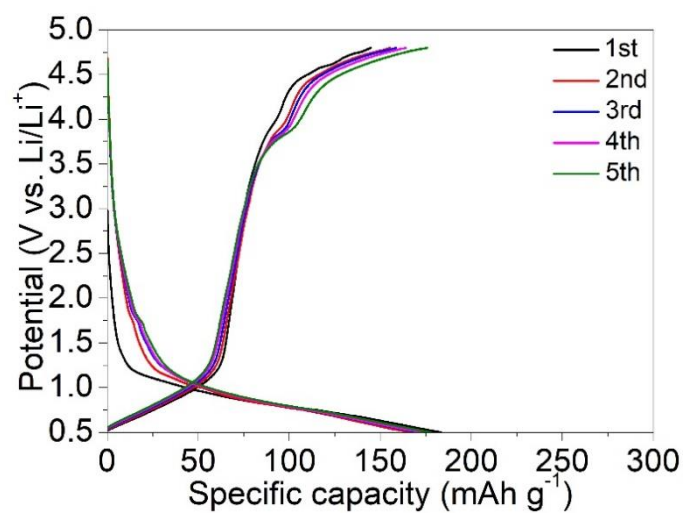

**Figure S3.** Galvanostatic discharge-charge profiles for the defluorinated graphite at a current rate of 0.05C in the voltage window of 1.5-4.8 V.

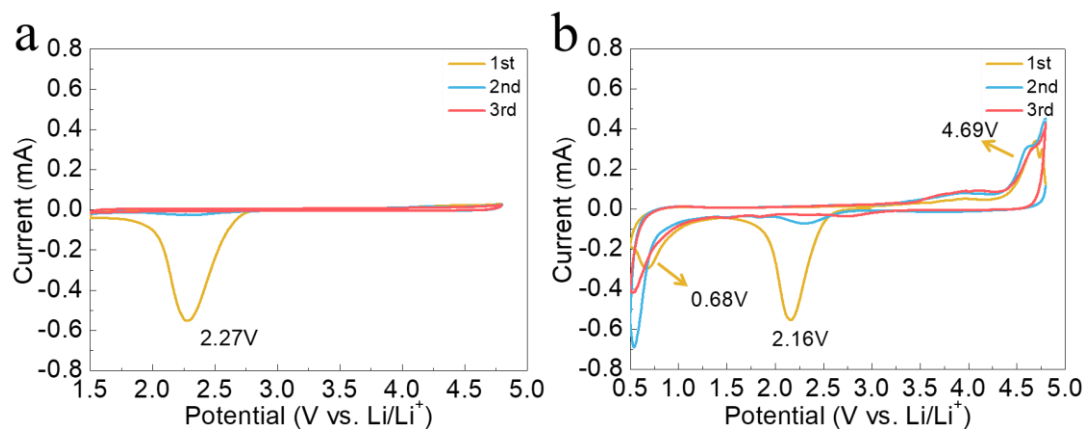

**Figure S4.** CV curves for the fluorinated graphite CF<sub>0.88</sub> at a scan rate of 0.1 mV s<sup>-1</sup> in the voltage window of 1.5-4.8 V (a) and 0.5-4.8 V (b).

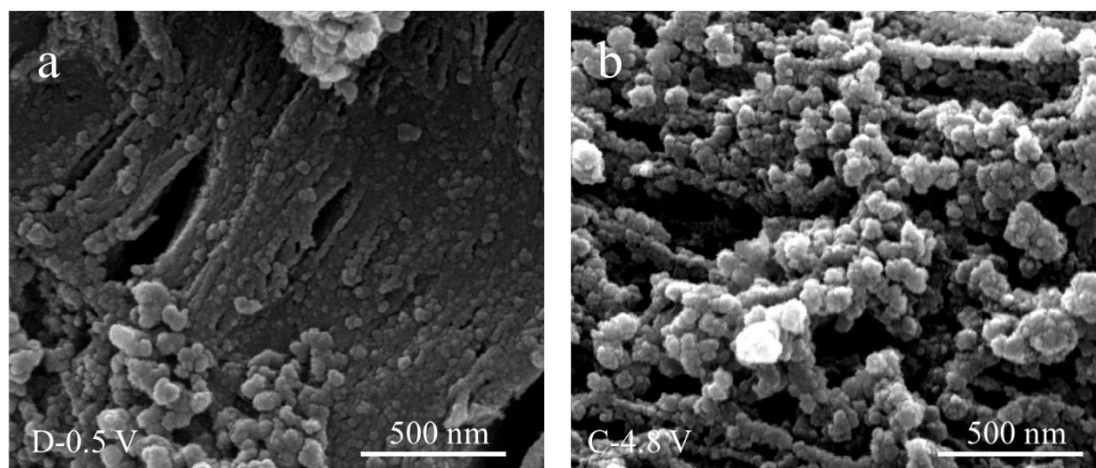

**Figure S5.** SEM images of fluorinated graphite CF<sub>0.88</sub> after discharging to 0.5 V (a) and then charging to 4.8 V (b).

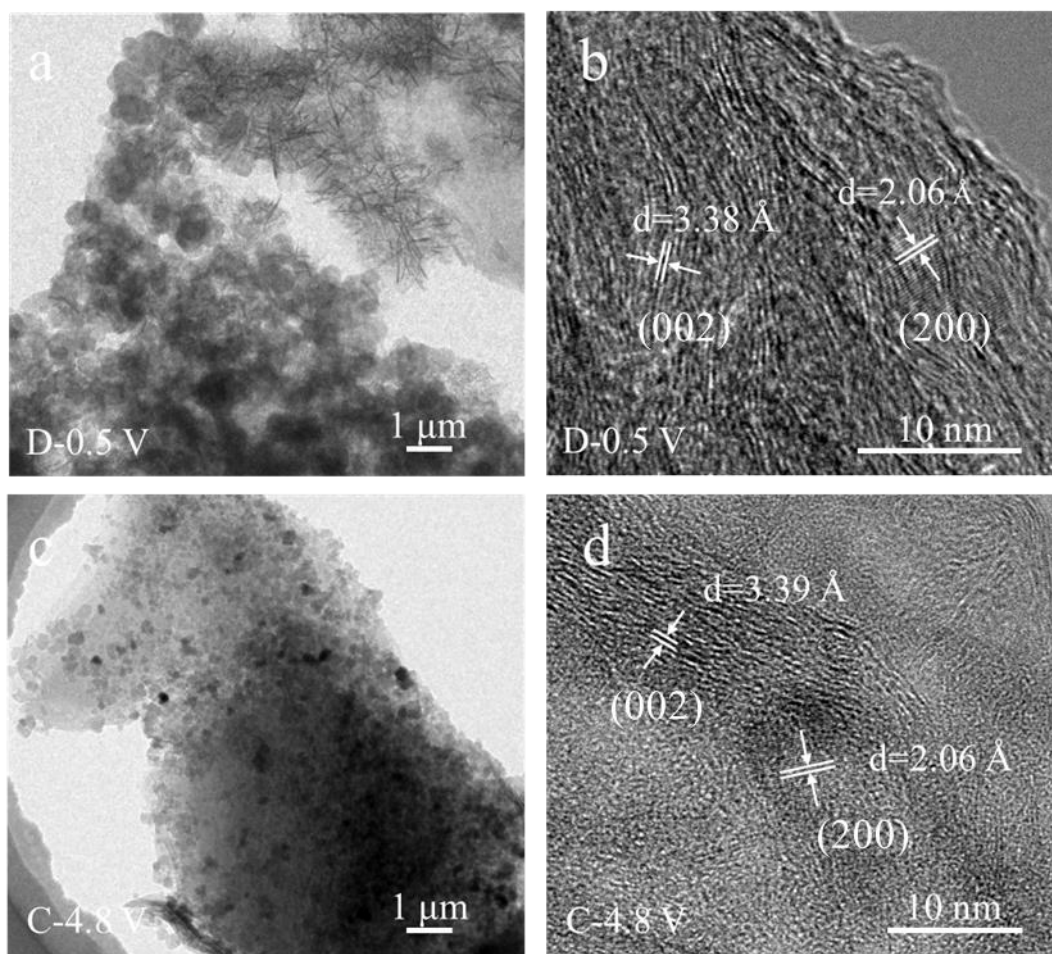

**Figure S6.** TEM images of fluorinated graphite  $\text{CF}_{0.88}$  after discharging to 0.5 V (a-b) and charging to 4.8 V (c-d).

**Table S1.** Specific energy of different CF<sub>x</sub>s under different cycles.

| <b>Materials</b> | <b>Cycle</b> | <b>Discharge specific<br/>energy<br/>(Wh/kg)</b> | <b>Charge specific<br/>energy<br/>(Wh/kg)</b> |
|------------------|--------------|--------------------------------------------------|-----------------------------------------------|
| F-graphite       | 1            | 2362                                             | 2931                                          |
|                  | 2            | 929                                              | 3254                                          |
|                  | 3            | 983                                              | 3589                                          |
|                  | 5            | 1081                                             | 4028                                          |
|                  | 10           | 713                                              | 2337                                          |
|                  | 15           | 696                                              | 2280                                          |
|                  | 20           | 508                                              | 1952                                          |
| F-graphene       | 1            | 2456                                             | 3164                                          |
|                  | 2            | 992                                              | 3786                                          |
|                  | 3            | 1078                                             | 3259                                          |
|                  | 5            | 834                                              | 2516                                          |
|                  | 10           | 411                                              | 972                                           |
|                  | 15           | 196                                              | 547                                           |
|                  | 20           | 225                                              | 594                                           |
| F-CNTs           | 1            | 2608                                             | 3666                                          |
|                  | 2            | 970                                              | 3577                                          |
|                  | 3            | 971                                              | 3107                                          |
|                  | 5            | 817                                              | 2355                                          |
|                  | 10           | 342                                              | 822                                           |
|                  | 15           | 149                                              | 471                                           |
|                  | 20           | 241                                              | 693                                           |



**Table S2.**  $R_s$ ,  $R_f$ , and  $R_{ct}$  of fluorinated graphite  $CF_{0.88}$  at different states of charge and discharge.

| Potential (V vs. $Li/Li^+$ ) | $R_s/\Omega$ | $R_f/\Omega$ | $R_{ct}/\Omega$ |
|------------------------------|--------------|--------------|-----------------|
| OCV-3.1 V                    | 2.8          | -            | 102.4           |
| 1st D-1.5 V                  | 3.3          | -            | 106.6           |
| 1st D-0.5V                   | 5.5          | 113.6        | 105.4           |
| 1st C-4.5 V                  | 3.6          | -            | 175.5           |
| 1st C-4.8 V                  | 5.3          | 22.5         | 458.4           |
| 2nd D-3.0 V                  | 4.6          | -            | 88.4            |
| 2nd D-1.5 V                  | 5.2          | -            | 107.3           |
| 2nd D-0.5 V                  | 7.9          | 99.2         | 139.8           |
| 2nd C-4.5 V                  | 4.7          | -            | 164.0           |
| 2nd C-4.8 V                  | 6.8          | 84.7         | 248.5           |
